# Supplementary material for: Centrosome-intrinsic mechanisms modulate centrosome integrity during fever
Source: PubMed Central journal article supplement — Mol Biol Cell. 2015 Oct 1;26(19):3451–63. doi: 10.1091/mbc.E15-03-0158 (PMC4591690; doi:10.1091/mbc.e15-03-0158), 2015-10-01
Supplement: supp_E15-03-0158v1_CombinedSupMats.pdf [file supp_E15-03-0158v1_CombinedSupMats.pdf]

# Supplemental Materials

*Molecular Biology of the Cell*

Vertii et al.

## SUPPLEMENTAL INFORMATION

### SUPPLEMENTAL DATA

#### **Figure S 1 (Related to Figure 6). Hsp70 is recruited to the centrosome during HS and protects it from damage.**

- A. Heat shock induces Hsp70 recruitment to centrosomes (middle panel). Pericentrin (red); asterisk enlargement. Hsp70 depletion (shHsp70, right panel) inhibits its centrosome recruitment after HS compared with control (shNT, left panel).
- B. Hsp70 is a bona fide centrosome protein in stressed cells: pre-treatment with Noc does not prevent Hsp70 from its centrosomal localization in heat shocked cells ( $\gamma$  tub, green, Hsp70, red; asterisk, enlargement).
- C. Semi-quantitative intensity profiles of  $\gamma$  tub after HS show that the cells expressing EGFPHsp70wt have increased levels of  $\gamma$  tub when compared to GFP alone.
- D. Percent of the cells with positive  $\gamma$  tub after HS in RPE cells, transfected with GFP or EGFPHsp70 (n=3 experiments, n=500-600 cells/sample, data presented as mean  $\pm$  SD and analyzed by T test).

#### **Figure S 2 (Related to Figure 6). Expression of centrosome-targeted (cHsp70) and centrosome-excluded (mHsp70) Hsp70 and verification of proper targeting.**

- A. Maximum projection of confocal microscopy images showing that centrosome-targeted Hsp70 cHsp70 co-localizes with centrosome (centrosome marker, Cent2, red), white asterisk indicates enlarged cell.
- B. Maximum projection of confocal microscopy images showing that centrosome-excluded Hsp70 mHsp70 is expressed at the cell membrane, as expected for proteins with myristoylation signal.
- C. Immunoblot showing levels of expression for GFP, EGFPHsp70wt (Hsp70), GFPHsp70PACT (cHsp70), and myrEGFPHsp70 (mHsp70), endogenous Hsp/Hsc70, and GAPDH, loading control.
- D. Maximum projection showing that expressed centrosome-targeted PACT fusion protein cHsp70 does not displace endogenous pericentrin from centrosomes. TR, transfected cell, NTR, non-transfected cell (PCNT, green, Hsp70, red, bar, 5 $\mu$ m).). Insert, semi-quantitative intensity profile.
- E. To exclude recruitment of membrane-targeted Hsp70 to the centrosome after HS, cells were left untreated or subjected to HS, cytosolic fraction was washed by pre-permeabilization with non-ionic detergent for 45 sec, and cells were fixed with methanol. Cells expressing centrosome-targeted Hsp70 cHsp70 localized to the centrosome ( $\gamma$  tub, red, cHsp70 in green) in HS and non-HS cells. Centrosome-excluded mHsp70 and GFP alone did not localize to centrosomes in control or HS cells.

**Figure S 3 (Related to Figure 6). Expression of centrosome-targeted (cHsp70) and centrosome-excluded (mHsp70) Hsp70 in rescue experiments and centrosome protection by cHsp70 in transiently transfected cells.**

- A.** Maximum projections of confocal microscopy images showing expression of centrosome–targeted Hsp70 (cHsp70) and its co-localization with Cent2 and maximum projections of confocal microscopy images showing expression of centrosome –excluded Hsp70 (mHsp70) and disruption of Cent2 staining in heat shocked RPE cells (bar, 10 $\mu$ m).
- B.** Protective role for cHsp70, but not GFP, PACT or mHsp70, in transiently transfected cells after HS (percent of  $\gamma$  tubulin positive cells, (n=4 experiments, n=250-700 cells/sample, data presented as mean $\pm$ SD and analyzed by one-way Anova combined with Tukey’s multiple comparison test).
- C.** Protective role for EGFPHsp70 (wtHsp70), EGFPHsp70PACT (cHsp70), but not GFP or myrEGFPHsp70 (mHsp70), in transiently transfected cells after HS (Centrin 2 signal, integrated intensity  $\times 10^5$  arbitrary units; n=40-50 centrosomes/sample, data presented as mean $\pm$ SEM and analyzed as in “B”).

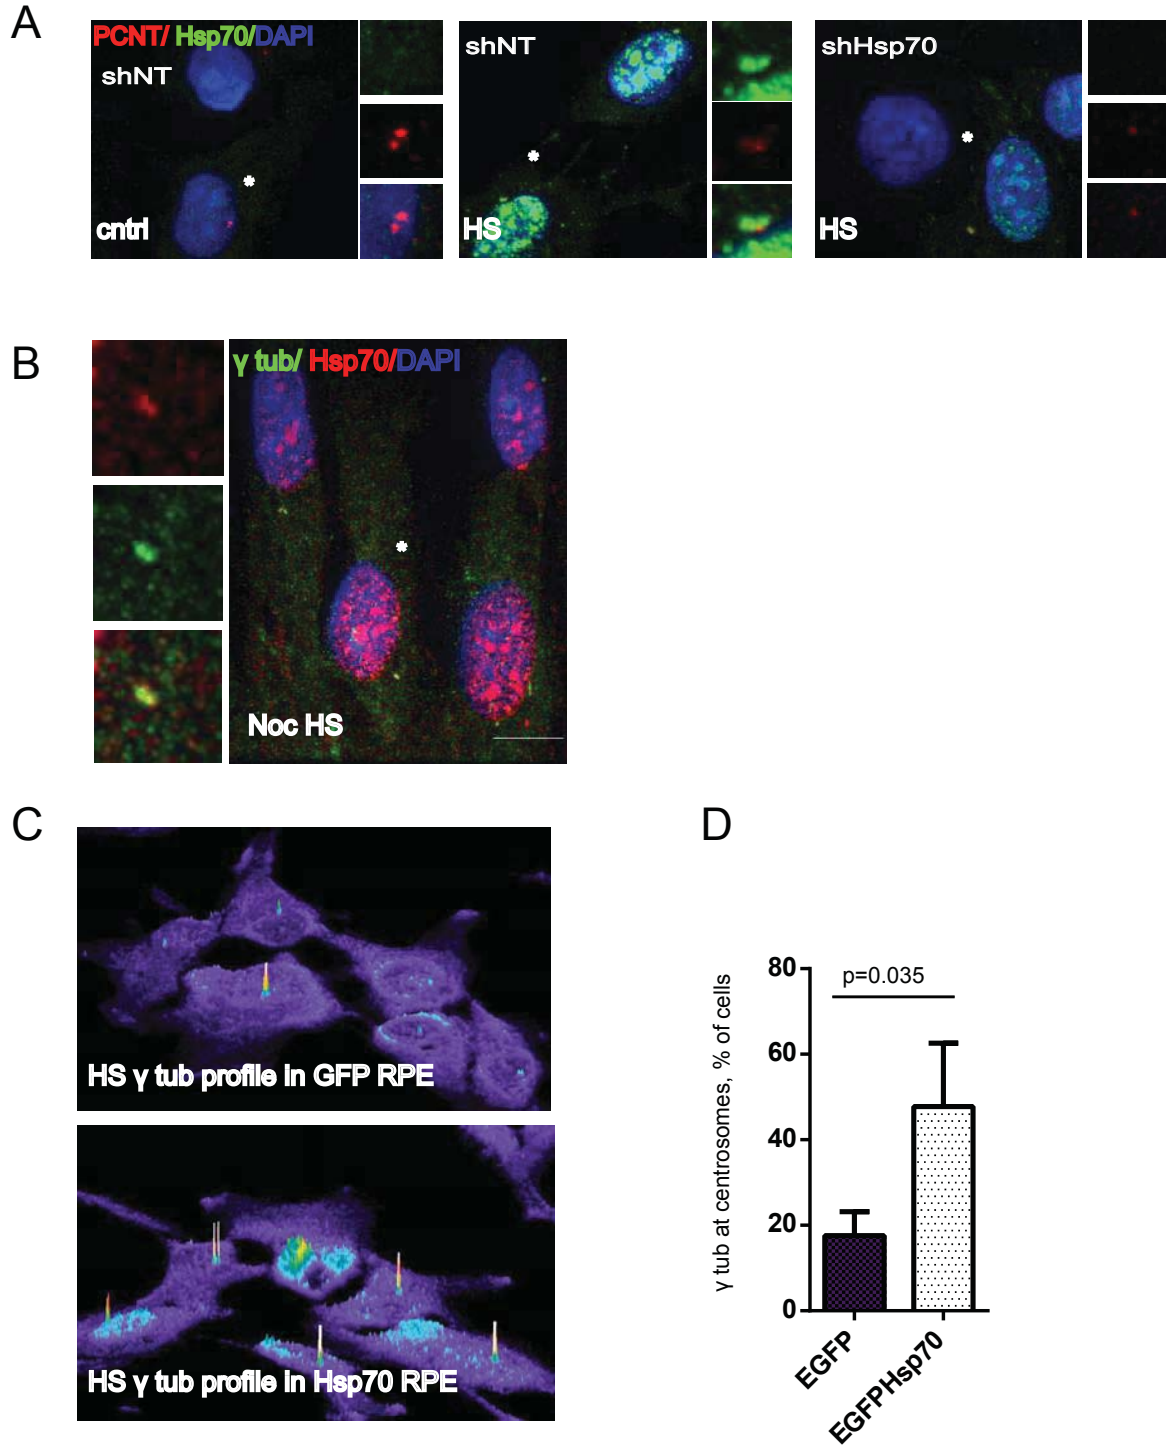

Figure S1. Related to Figure 6. Hsp70 is recruited to the centrosome during HS and protects it from damage.

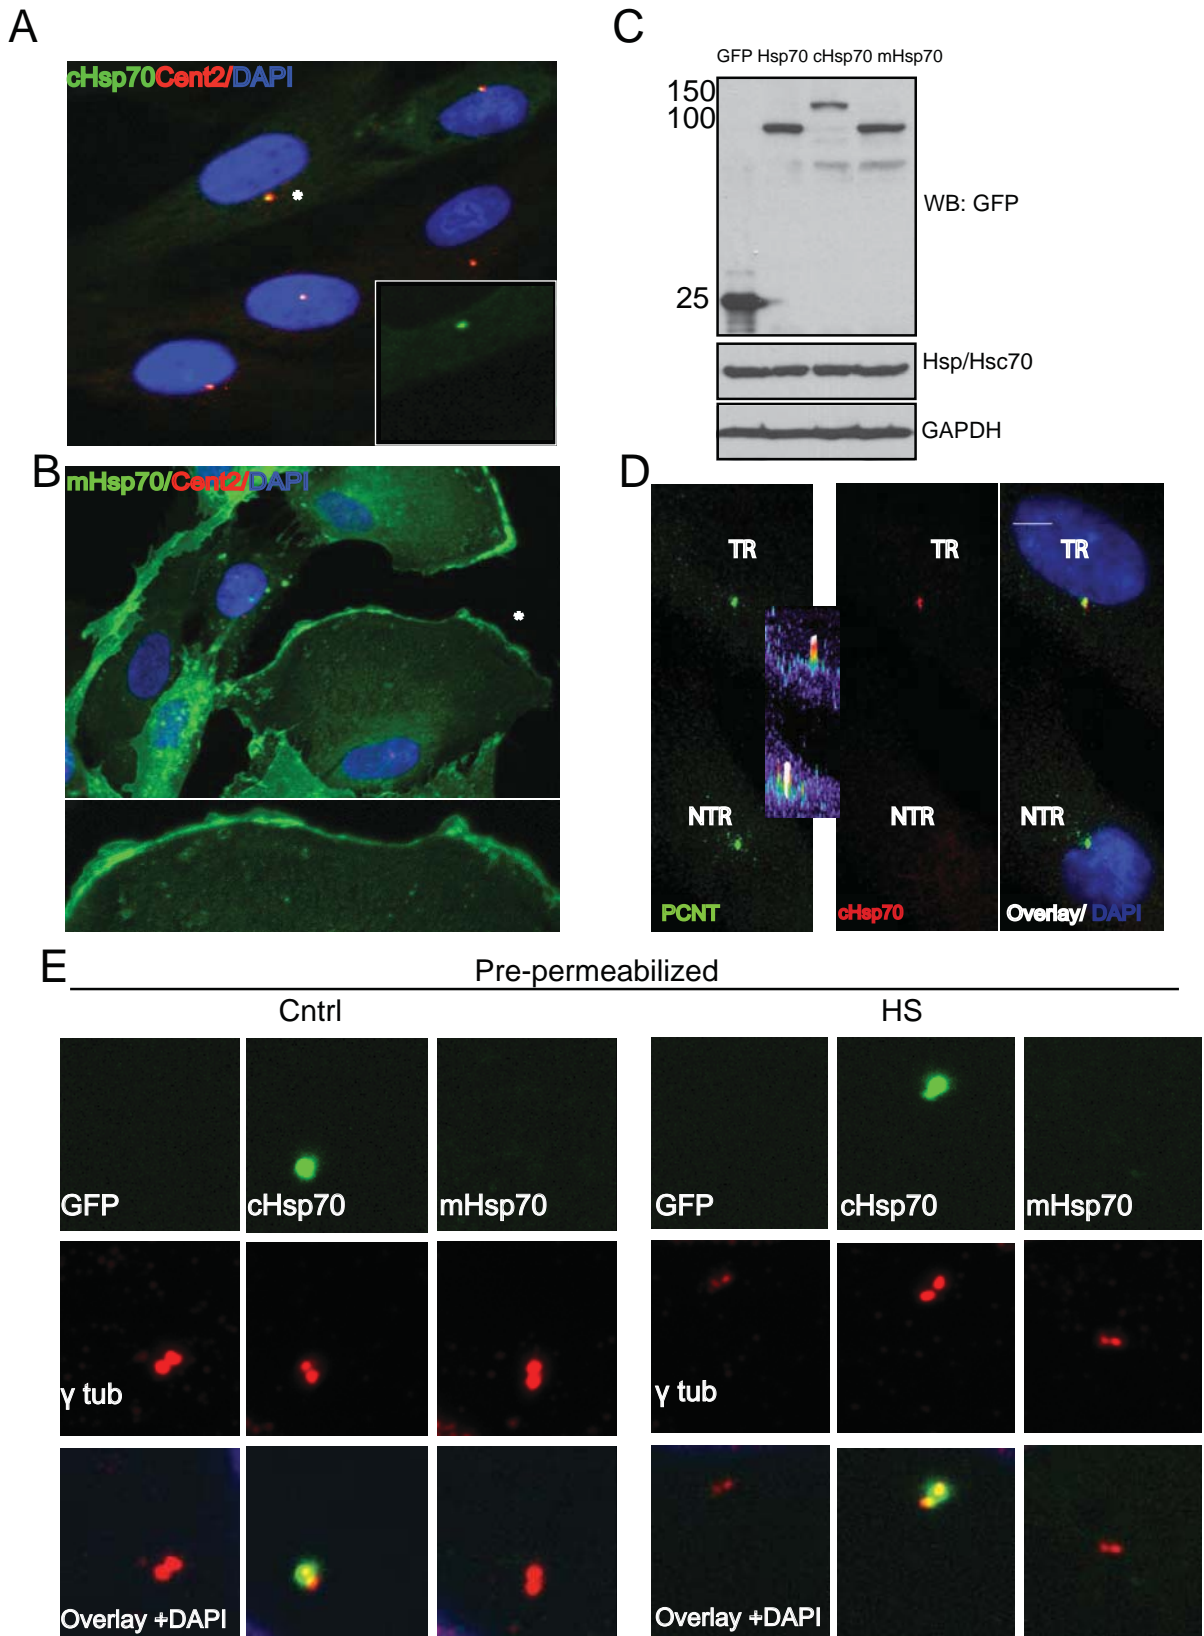

Figure S2. Related to Figure 6. Expression of centrosome-targeted (cHsp70) and centrosome-excluded (mHsp70) and verification of proper targeting

A

HS

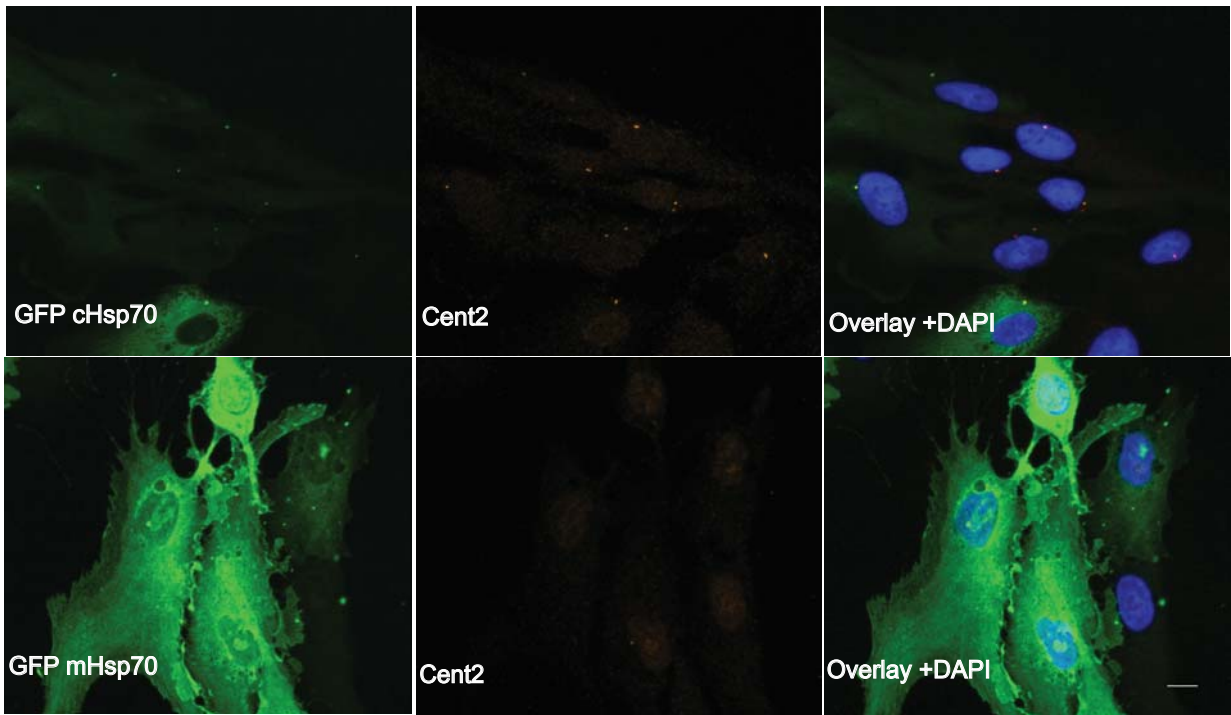

B

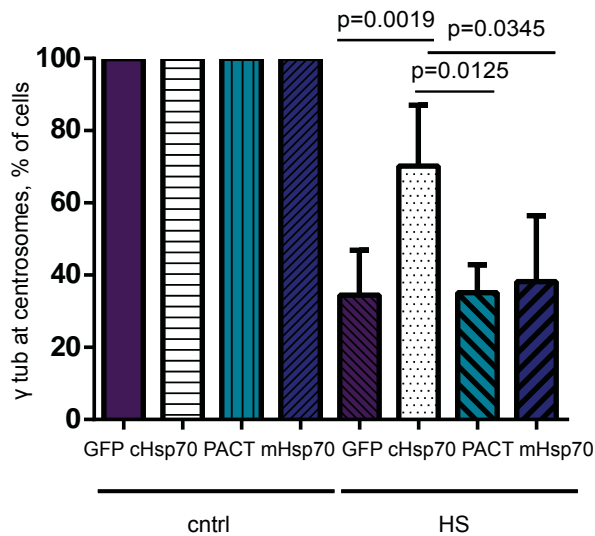

C

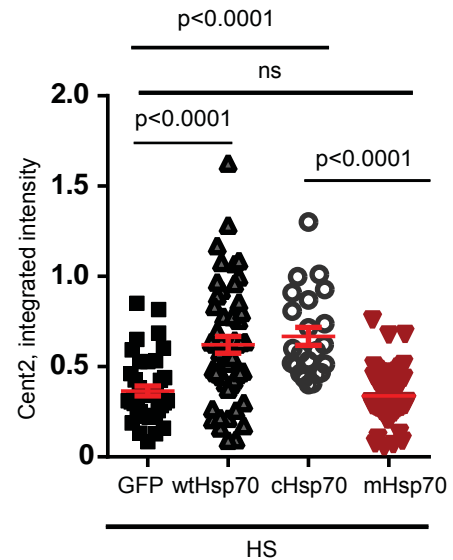

Figure S3. Related to Figure 6. Expression of centrosome-targeted (cHsp70) and centrosome-excluded (mHsp70) in rescue experiments and centrosome protection by cHsp70 in transiently transfected cells
